# Supplementary material
Source: PubMed Central journal article supplement (PMC5740872)
Supplement: NIHMS920037-supplement-Supporting_Info.pdf [file NIHMS920037-supplement-Supporting_Info.pdf]

**Supporting Information:** *Thalassosamide, a Siderophore Discovered from the Marine-Derived Bacterium *Thalassospira profundimaris**

**Thalassosamide, a Siderophore Discovered from the Marine-Derived Bacterium *Thalassospira profundimaris***

Fan Zhang,<sup>†</sup> Kenneth Barns,<sup>‡</sup> F. Michael Hoffmann,<sup>‡</sup> Doug R. Braun,<sup>†</sup> David R. Andes,<sup>§</sup> and Tim S. Bugni<sup>\*,†</sup>

<sup>†</sup>Pharmaceutical Sciences Division, University of Wisconsin–Madison, Madison, Wisconsin 53705, United States

<sup>‡</sup>Small Molecule Screening & Synthesis Facility, UW Carbone Cancer Center, Madison, Wisconsin, United States

<sup>§</sup>Department of Medicine, University of Wisconsin–Madison, Madison, Wisconsin 53705, United States

\* To whom correspondence should be addressed. Tel.: 1-608-263-2519. E-mail:

[tim.bugni@wisc.edu](mailto:tim.bugni@wisc.edu).

## **Supporting Information Table of Contents**

| <b><u>Contents</u></b>                                                                                                                                   | <b><u>Page</u></b> |
|----------------------------------------------------------------------------------------------------------------------------------------------------------|--------------------|
| 1) <b>Figure S1.</b> $^1\text{H}$ NMR spectrum of thalassosamide ( <b>1</b> ; 600 MHz, $\text{DMSO-}d_6$ ).....                                          | 3                  |
| 2) <b>Figure S2.</b> $^{13}\text{C}$ NMR spectrum of thalassosamide ( <b>1</b> ; 125 MHz, $\text{DMSO-}d_6$ ).....                                       | 4                  |
| 3) <b>Figure S3.</b> gCOSY spectrum of thalassosamide ( <b>1</b> ; 600 MHz, $\text{DMSO-}d_6$ ).....                                                     | 5                  |
| 4) <b>Figure S4.</b> gHSQC spectrum of thalassosamide ( <b>1</b> ; 600 MHz, $\text{DMSO-}d_6$ ).....                                                     | 6                  |
| 5) <b>Figure S5.</b> gHMBC spectrum of thalassosamide ( <b>1</b> ; 600 MHz, $\text{DMSO-}d_6$ ).....                                                     | 7                  |
| 6) <b>Figure S6.</b> $^1\text{H}$ NMR spectrum of compound <b>2</b> (600 MHz, $\text{CDCl}_3:\text{CD}_3\text{OD}$ 4:1).....                             | 8                  |
| 7) <b>Figure S7.</b> $^{13}\text{C}$ NMR spectrum of compound <b>2</b> (600 MHz, $\text{CDCl}_3:\text{CD}_3\text{OD}$ 4:1).....                          | 9                  |
| 8) <b>Figure S8.</b> gCOSY spectrum of compound <b>2</b> (600 MHz, $\text{CDCl}_3:\text{CD}_3\text{OD}$ 4:1).....                                        | 10                 |
| 9) <b>Figure S9.</b> gHSQC spectrum of compound <b>2</b> (600 MHz, $\text{CDCl}_3:\text{CD}_3\text{OD}$ 4:1).....                                        | 11                 |
| 10) <b>Figure S10.</b> gHMBC spectrum of compound <b>2</b> (600 MHz, $\text{CDCl}_3:\text{CD}_3\text{OD}$ 4:1).....                                      | 12                 |
| 11) <b>Figure S11.</b> Positive ion HRESIMS of thalassosamide ( <b>1</b> ).....                                                                          | 13                 |
| 12) <b>Figure S12.</b> Positive ion HRESIMS of compound <b>2</b> .....                                                                                   | 14                 |
| 13) <b>Figure S13.</b> Negative ion ESI-MS/MS spectrum of thalassosamide ( <b>1</b> ).....                                                               | 15                 |
| 14) <b>Figure S14.</b> A heat map to display high throughput screening results of<br>WMMC 317 against <i>Pseudomonas aeruginosa</i> (ATCC # 275853)..... | 16                 |
| 15) <b>Figure S15.</b> A heat map to display high throughput screening results of<br>WMMC 317 against <i>Staphylococcus aureus</i> .....                 | 17                 |
| 16) <b>Figure S16.</b> A heat map to display high throughput screening results of<br>WMMC 317 against <i>Candida albicans</i> .....                      | 18                 |
| 17) <b>Figure S17.</b> A heat map to display high throughput screening results of<br>WMMC 317 against <i>E. coli</i> .....                               | 19                 |
| 18) <b>Table S1.</b> DFT calculated $^{13}\text{C}$ NMR chemical shifts for thalassosamide<br>stereoisomer models.....                                   | 20–21              |
| 19) <b>Table S2.</b> DP4 probability calculation for thalassosamide stereoisomer models.....                                                             | 22                 |

**Figure S1.**  $^1\text{H}$  NMR Spectrum of Thalassosamide (**1**; 600 MHz,  $\text{DMSO-}d_6$ )

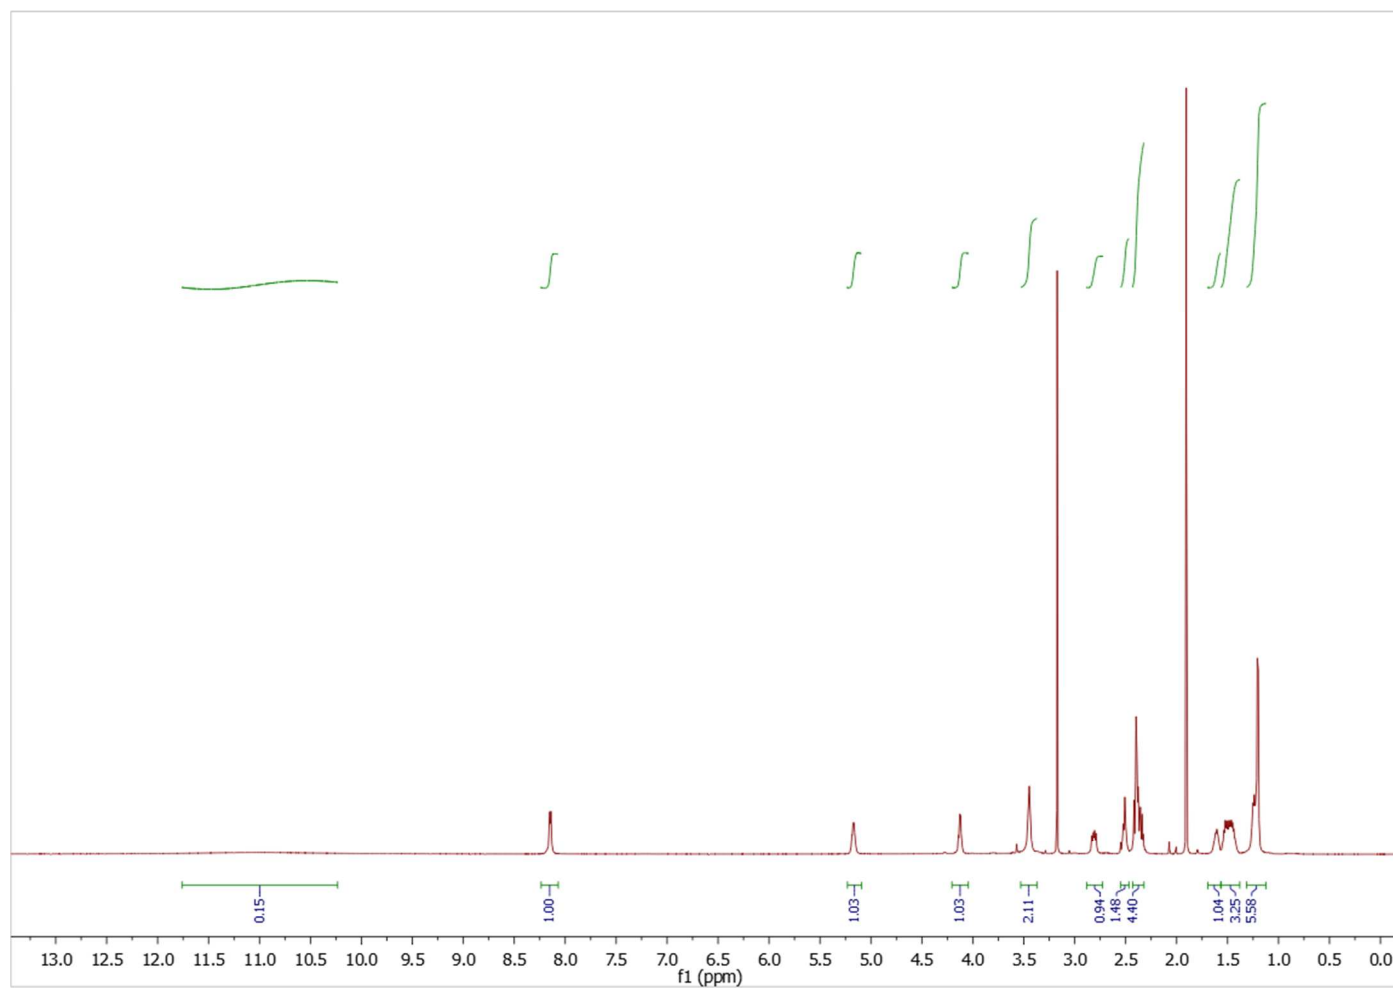

**Figure S2.**  $^{13}\text{C}$  NMR Spectrum of Thalassosamide (**1**; 125 MHz,  $\text{DMSO-}d_6$ ).

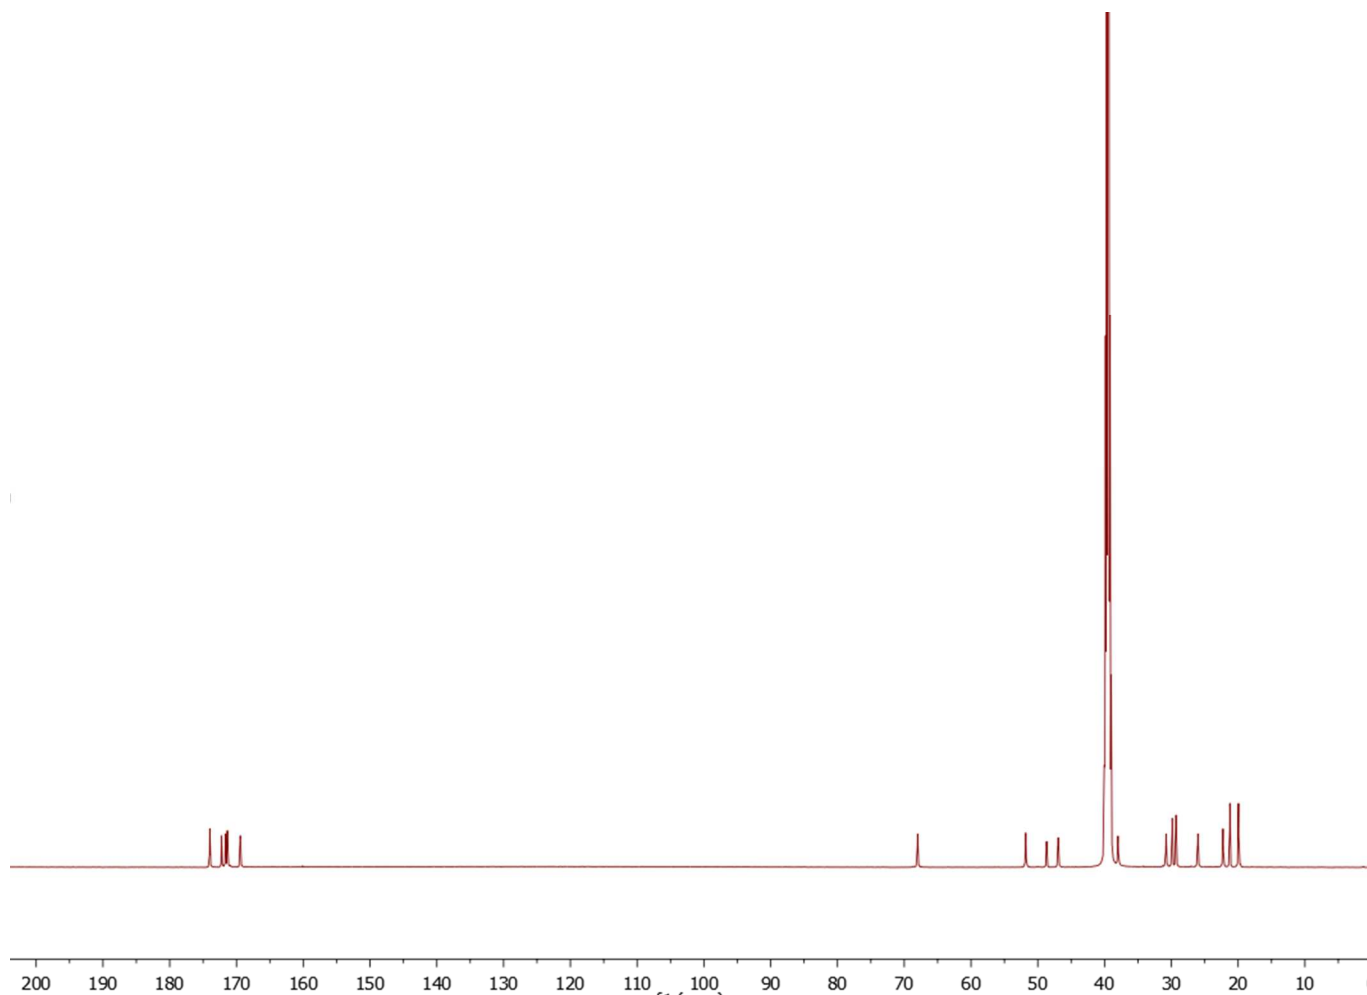

**Figure S3.** gCOSY Spectrum of Thalassosamide (**1**; 600 MHz, DMSO- $d_6$ ).

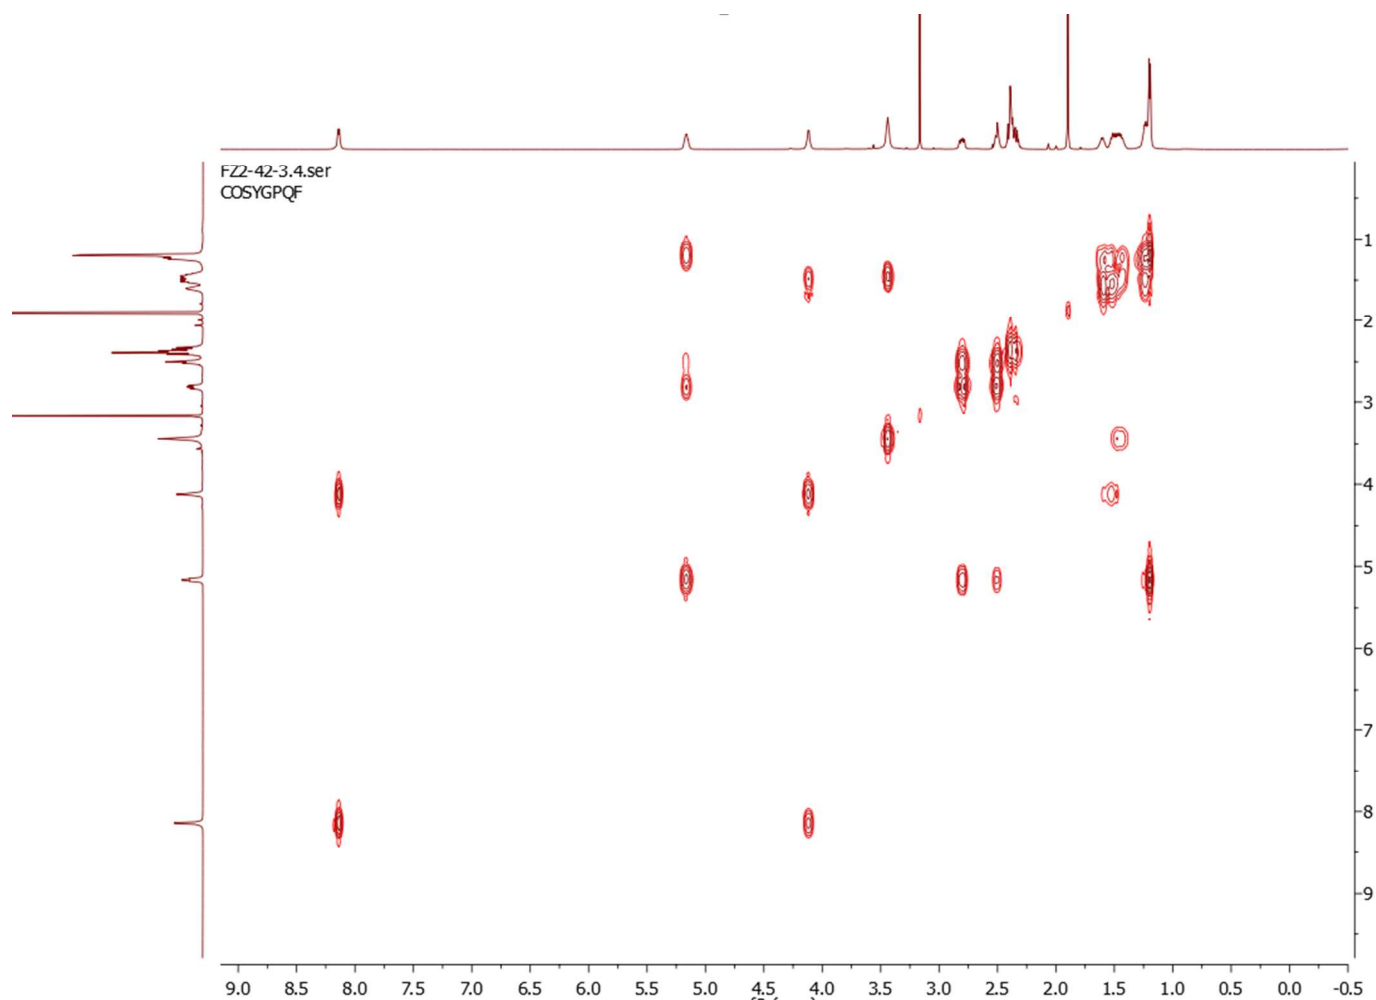

**Figure S4.** gHSQC Spectrum of Thalassosamide (**1**; 600 MHz, DMSO- $d_6$ ).

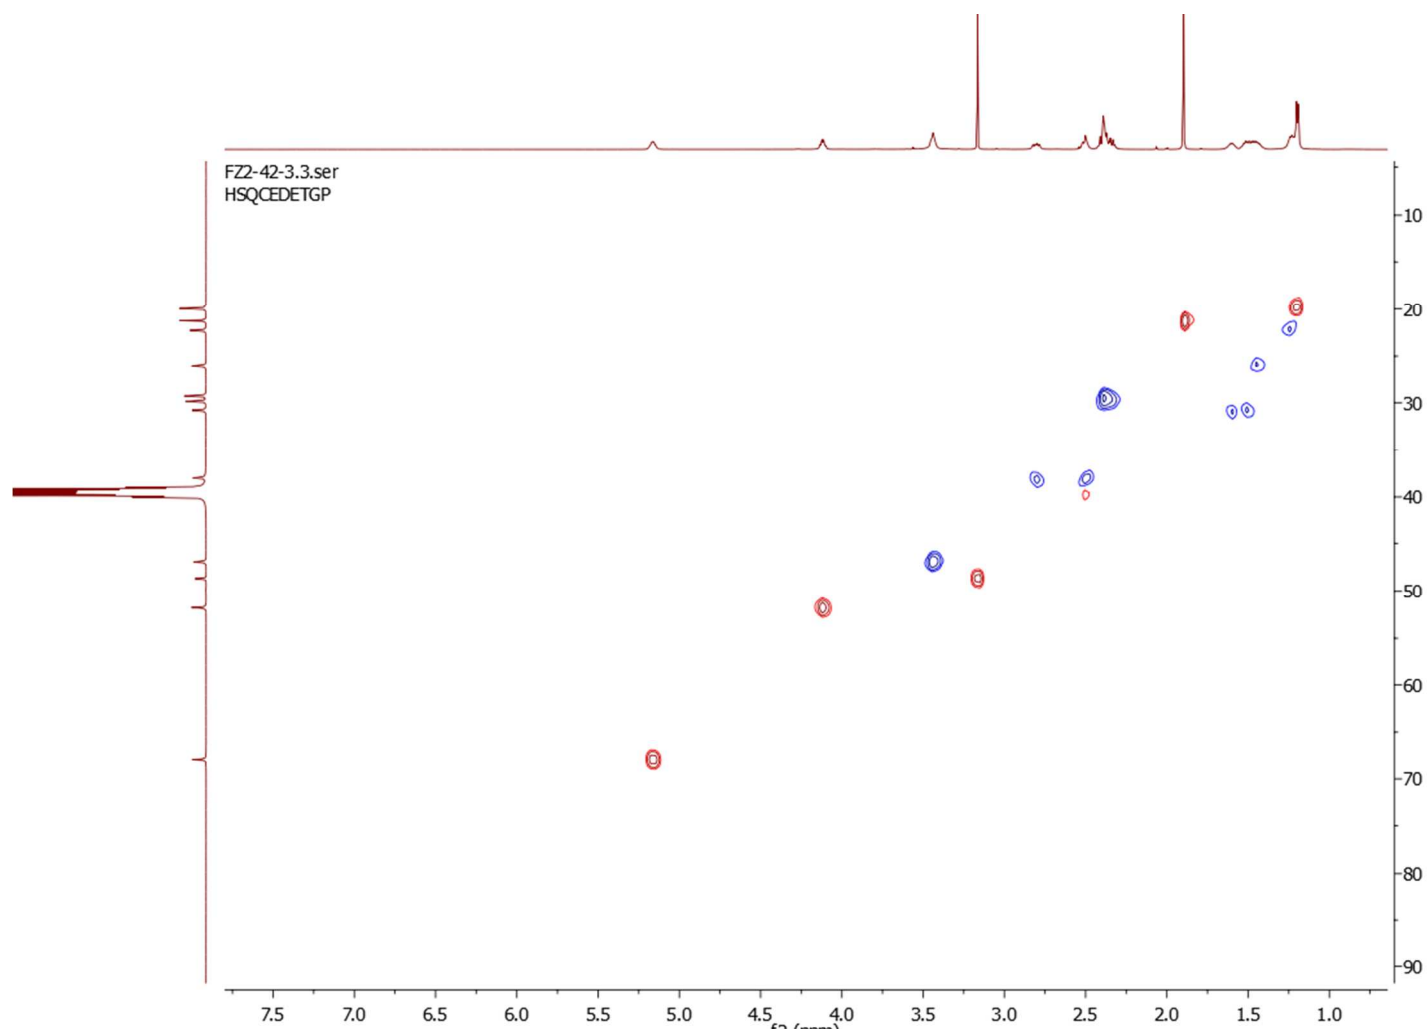

Figure S5. gHMBC Spectrum of Thalassosamide (1; 600 MHz, DMSO- $d_6$ ).

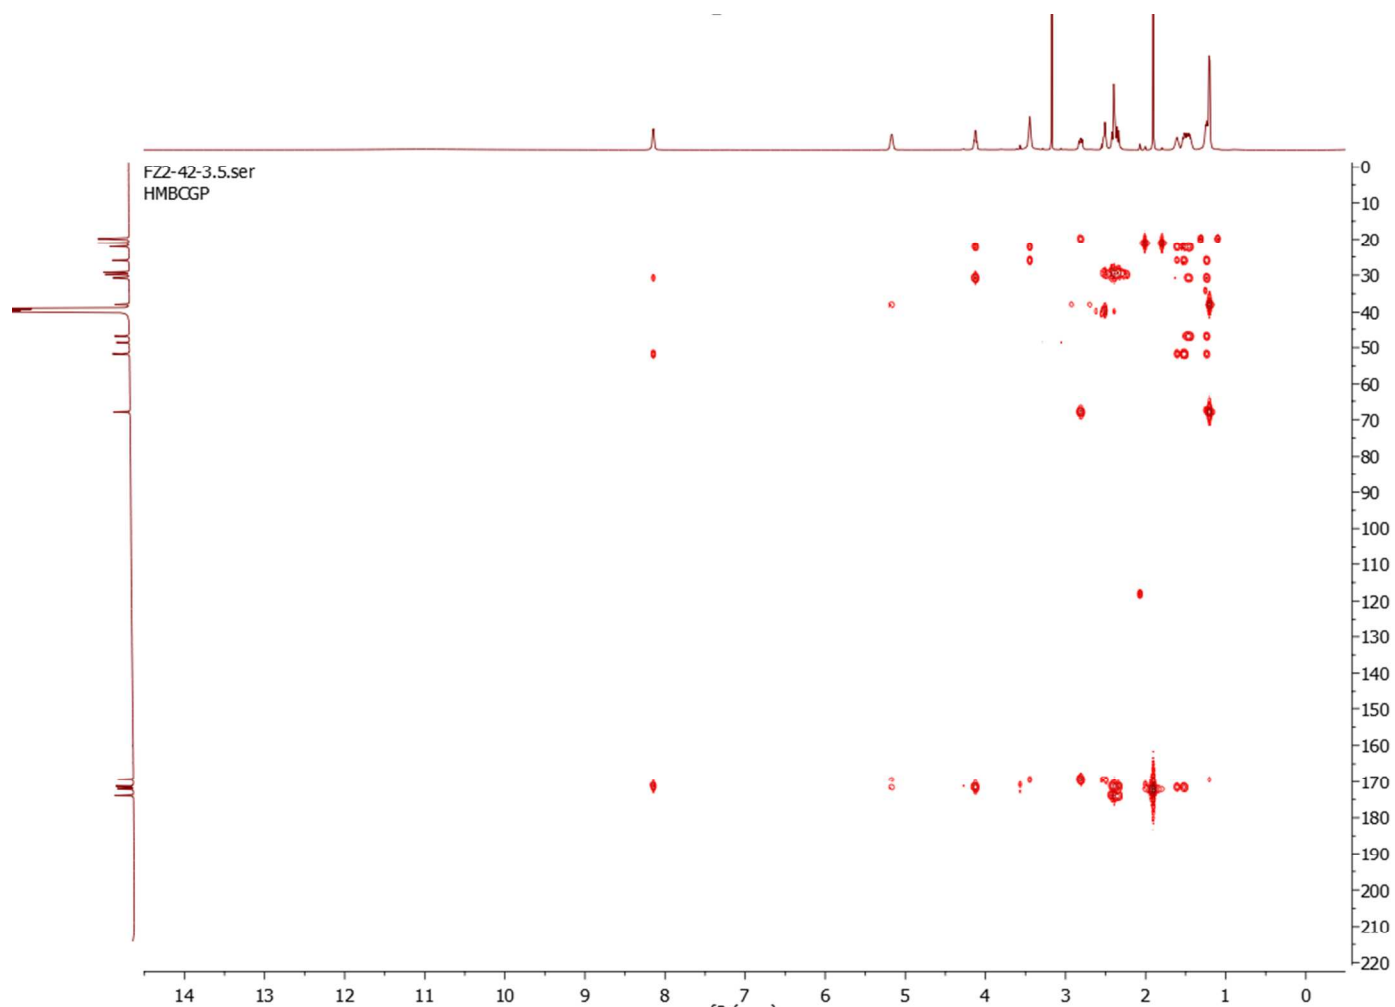

Figure S6.  $^1\text{H}$  NMR Spectrum of Compound **2** (600 MHz,  $\text{CDCl}_3:\text{CD}_3\text{OD}$  4:1)

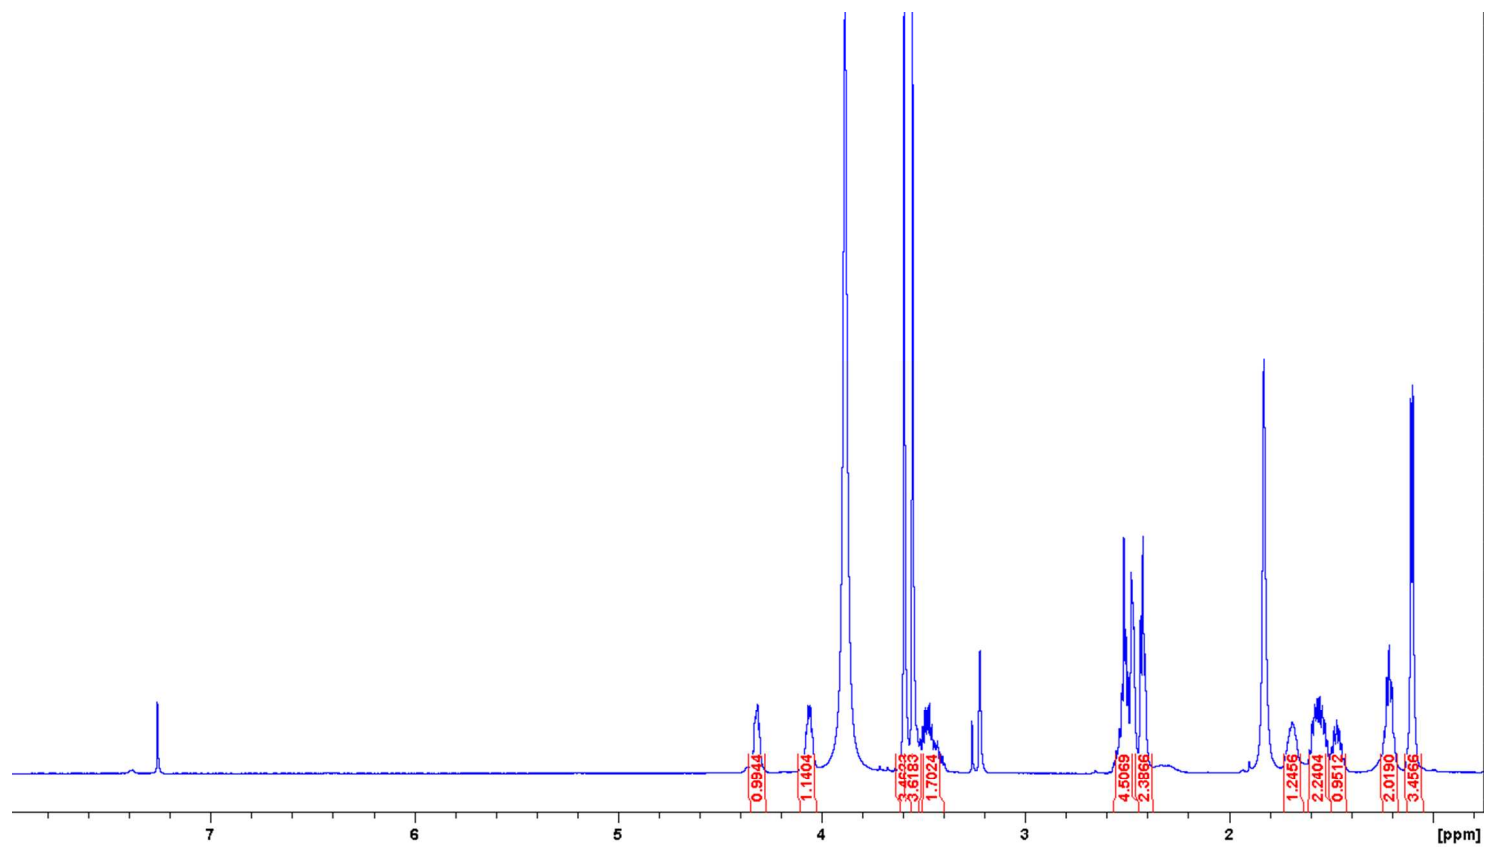



**Figure S7.**  $^{13}\text{C}$  NMR Spectrum of Compound **2** (150 MHz,  $\text{CDCl}_3:\text{CD}_3\text{OD}$  4:1).

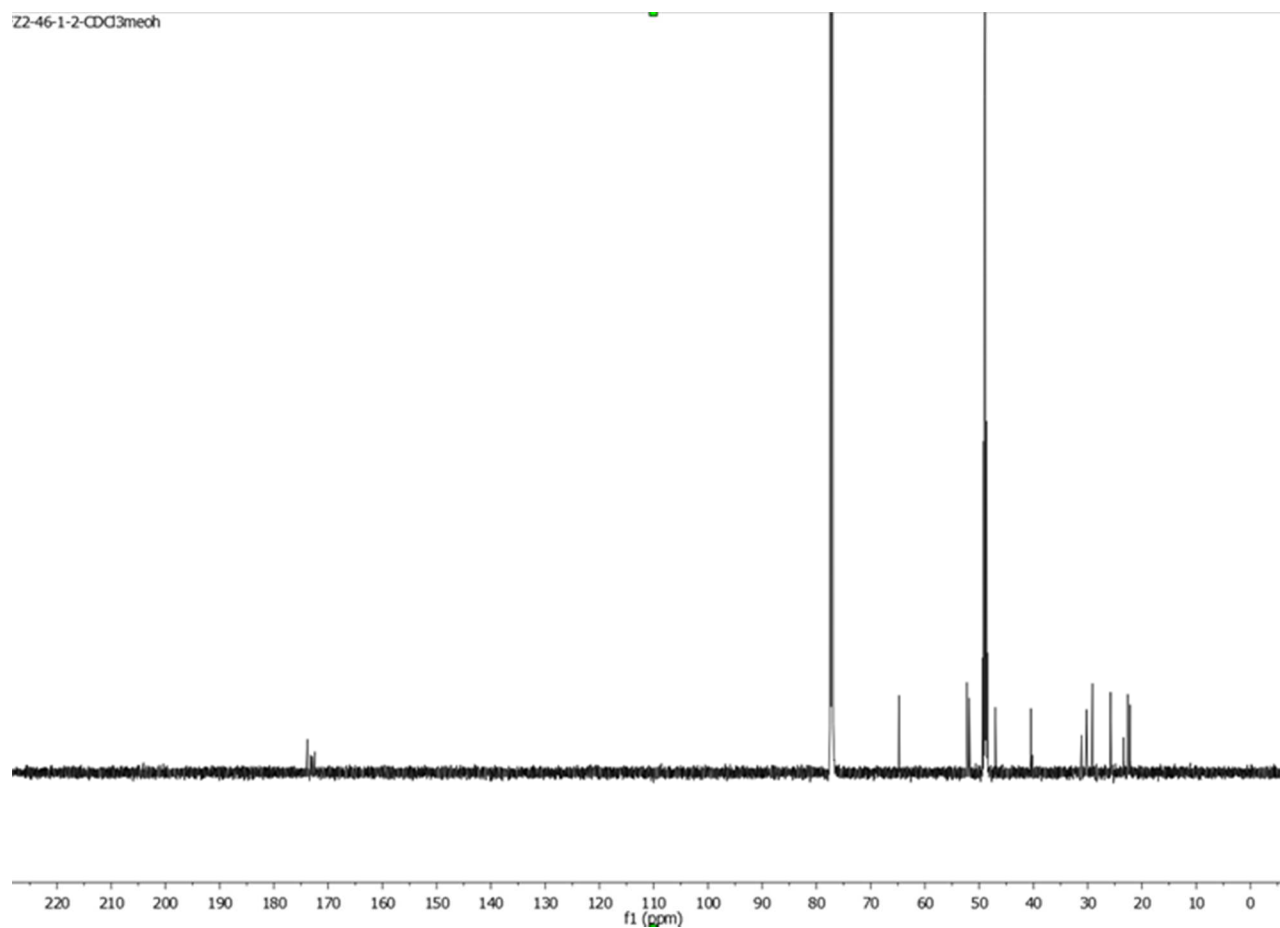

**Figure S8.** gCOSY Spectrum of Compound **2** (600 MHz, CDCl<sub>3</sub>:CD<sub>3</sub>OD 4:1).

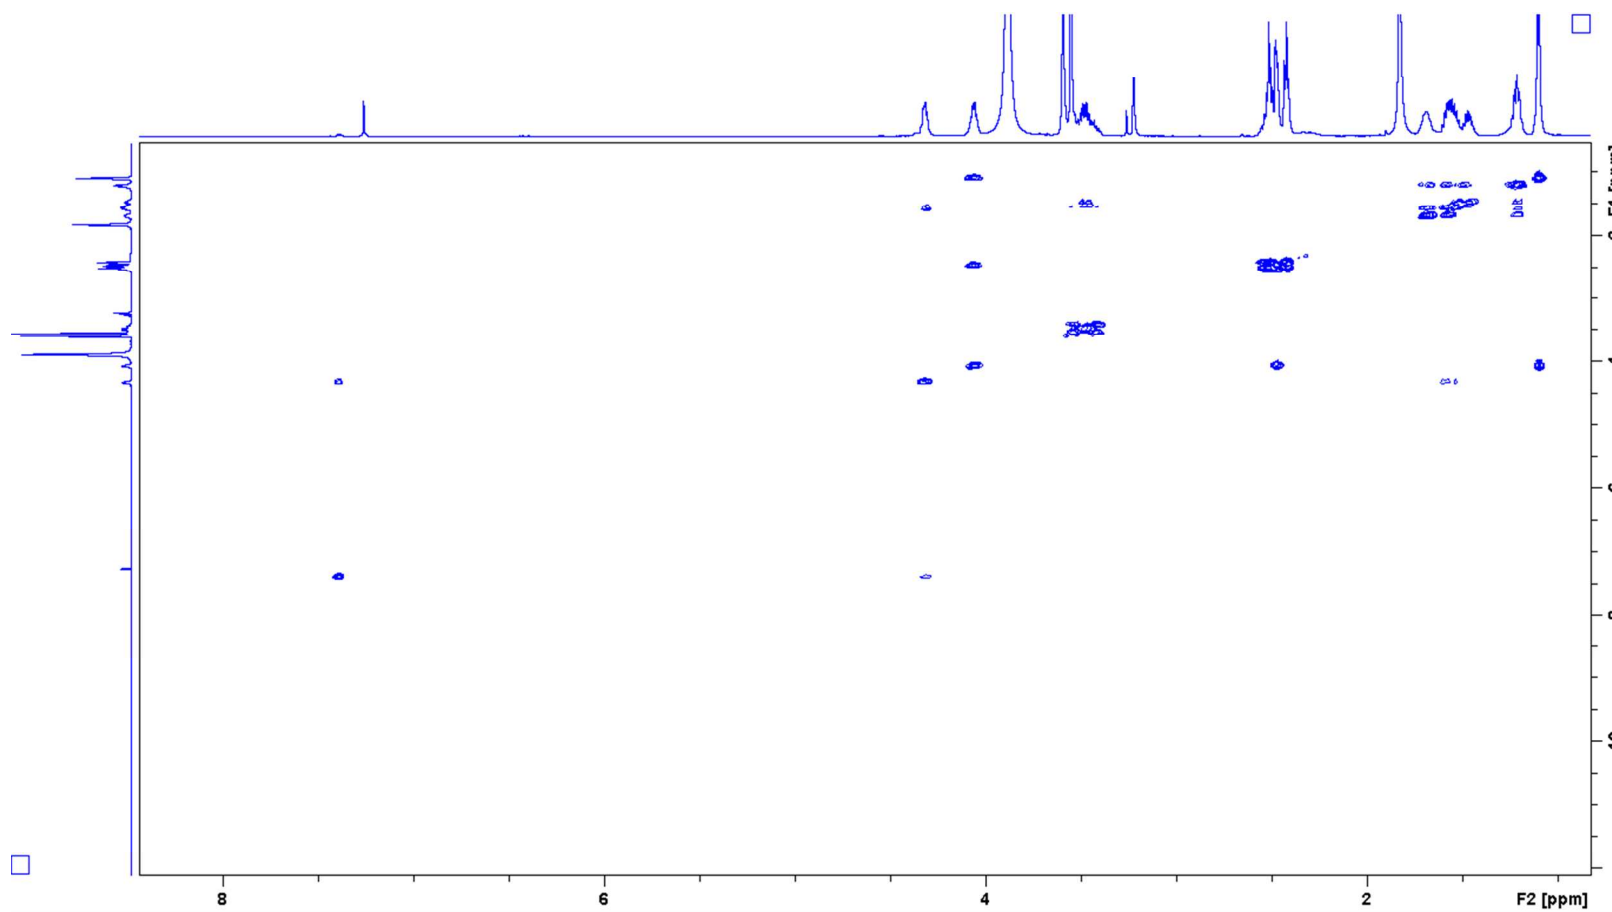

**Figure S9.** gHSQC Spectrum of Compound **2** (600 MHz, CDCl<sub>3</sub>:CD<sub>3</sub>OD 4:1).

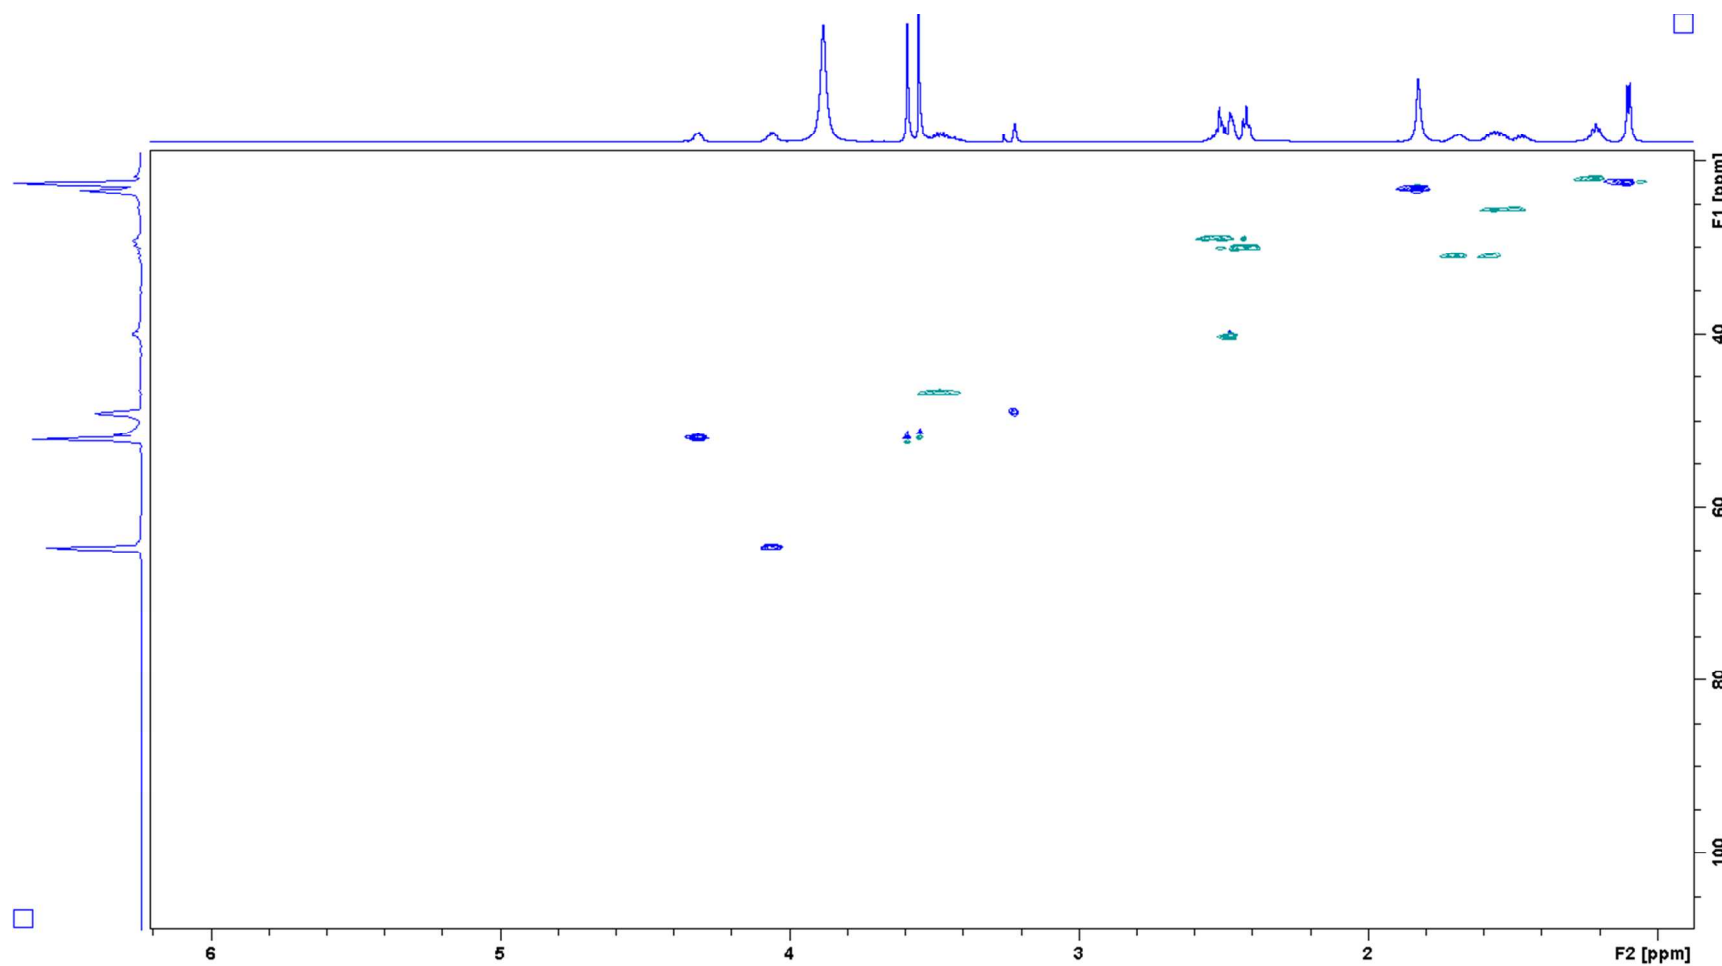



**Figure S11.** Positive Ion HRESIMS of Thalassosamide (1).

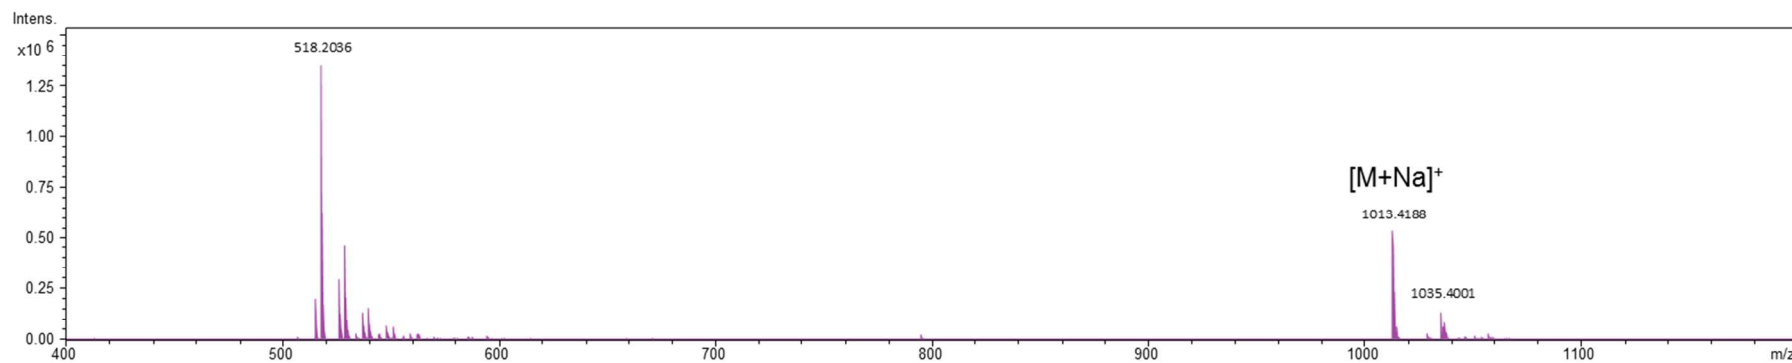

**Figure S12.** Positive Ion HRESIMS of Compound **2**.

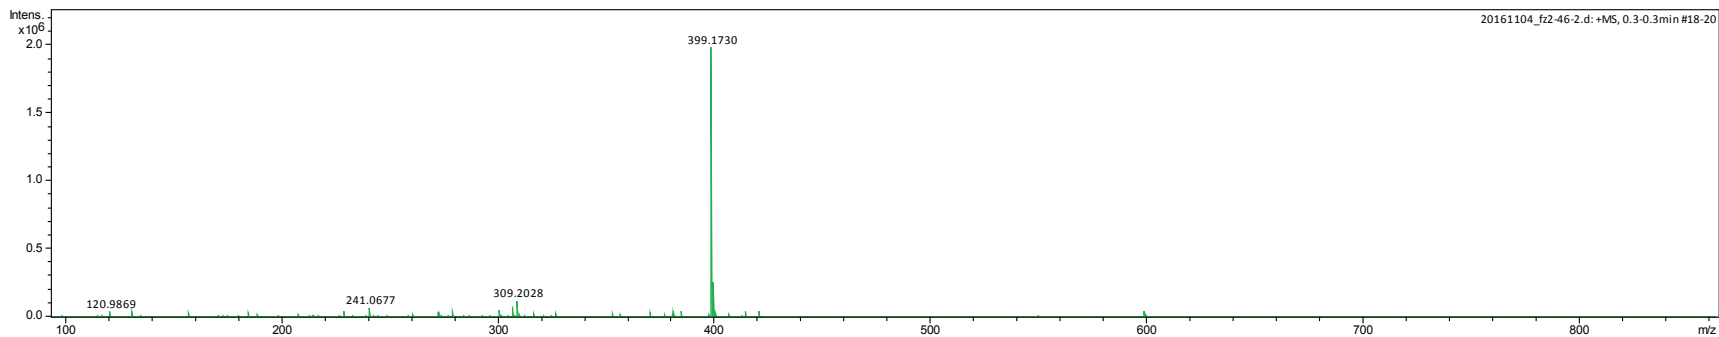

**Figure S13.** Negative Ion ESI-MS/MS spectrum of Thalassosamide (1).

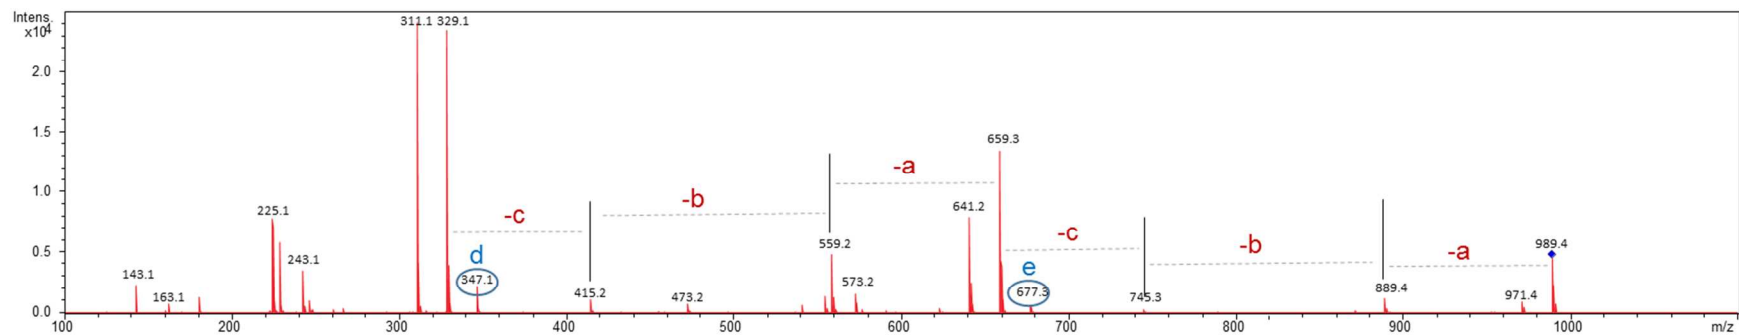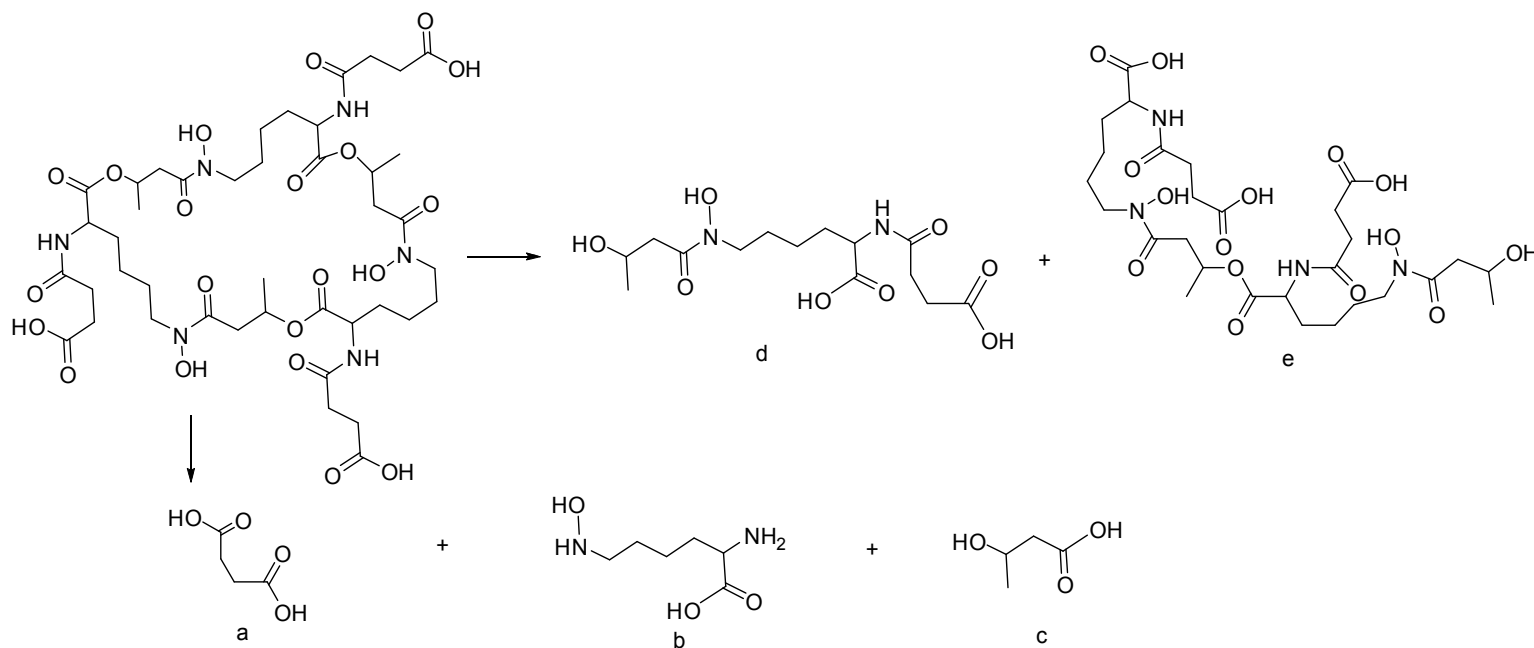

**Figure S14.** A heat map to display high throughput screening results of WMMC 317 against *Pseudomonas auruginosa* (ATCC # 275853).

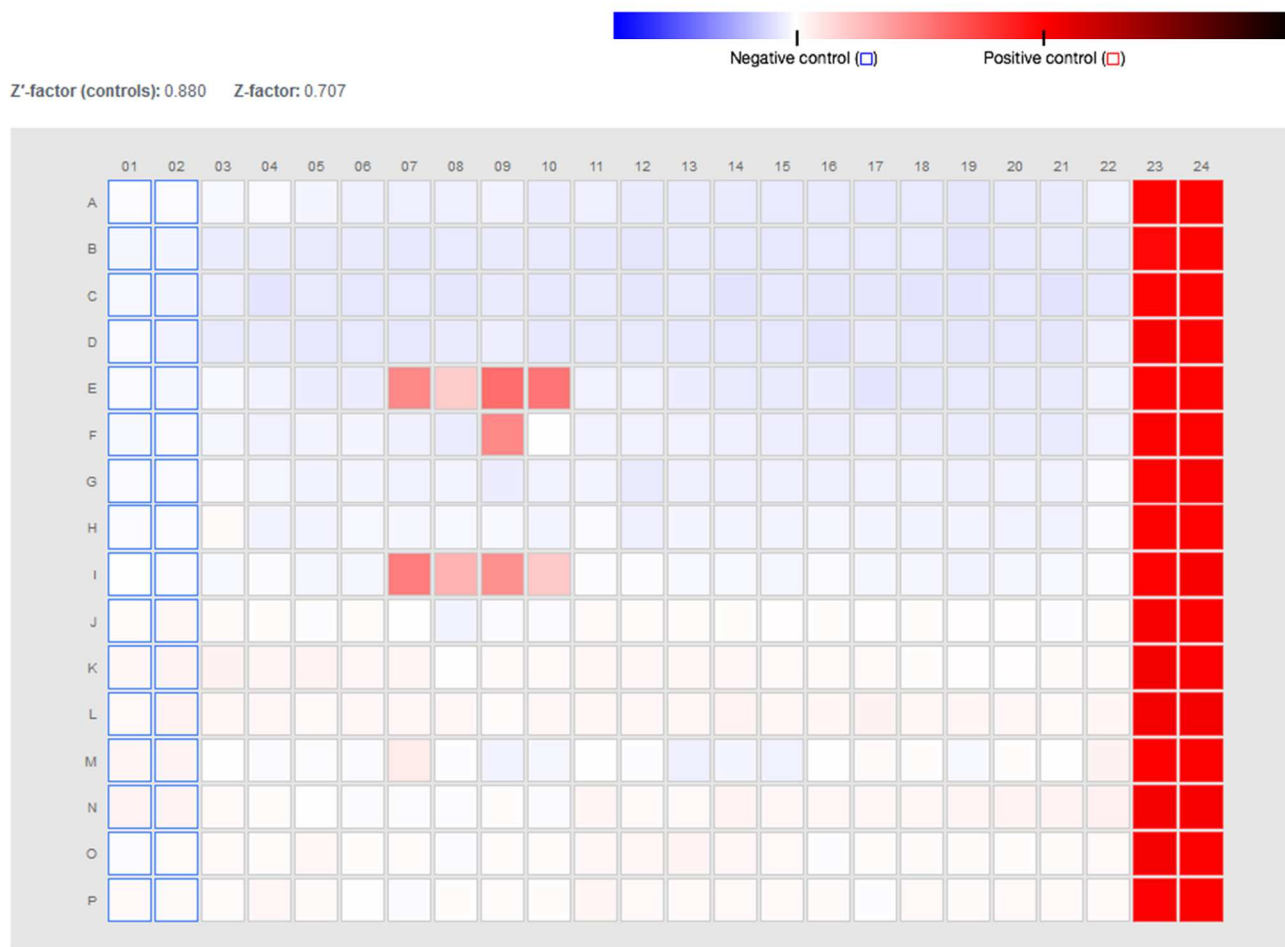



**Figure S15.** A heat map to display high throughput screening results of WMMC 317 against *Staphylococcus aureus*.

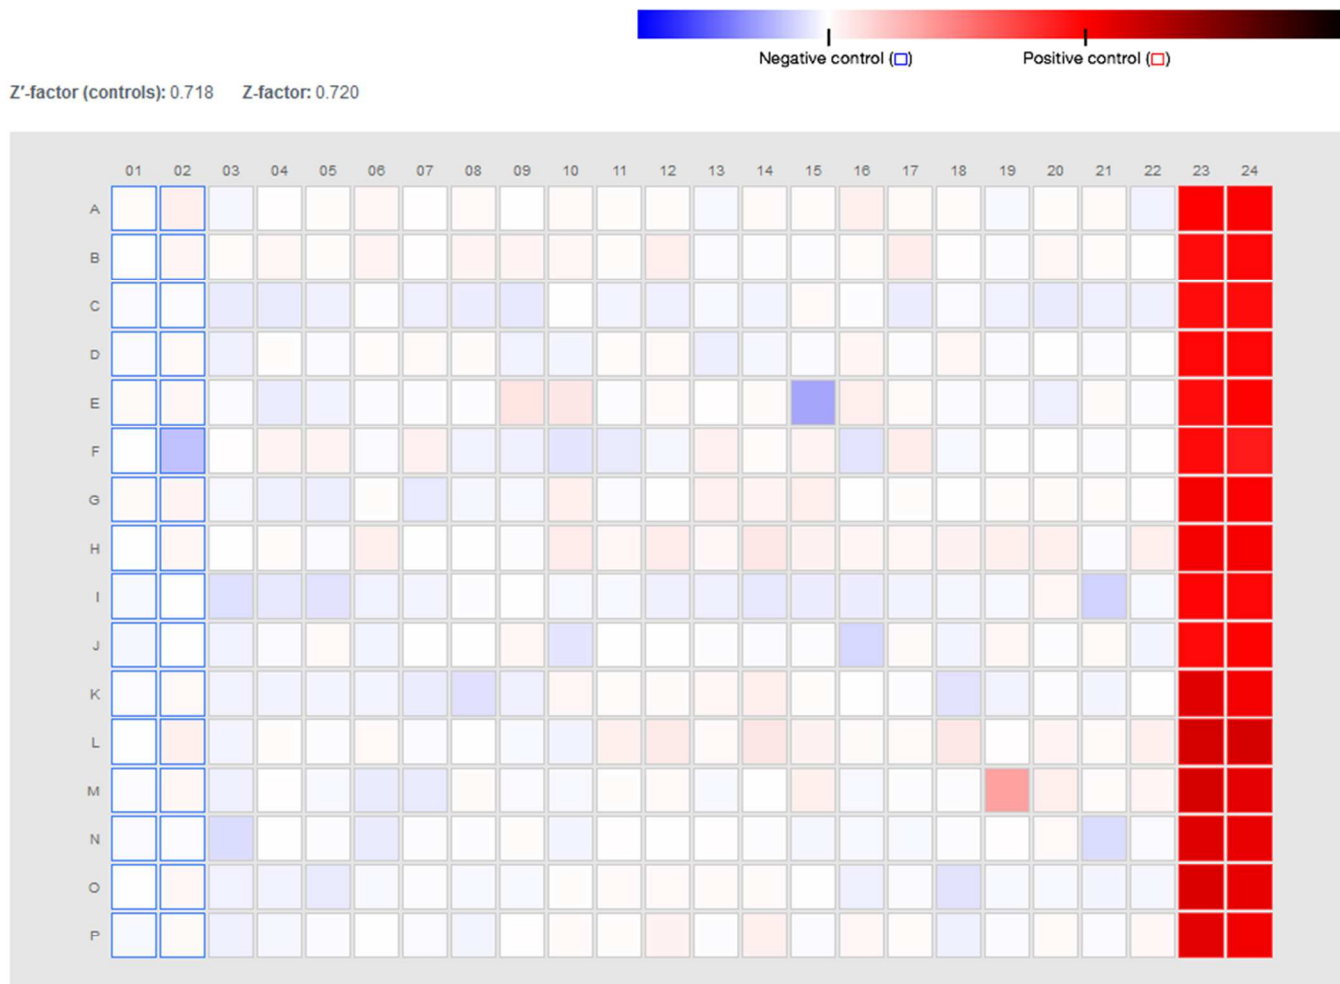

**Figure S16.** A heat map to display high throughput screening results of WMMC 317 against *Candida albicans*.

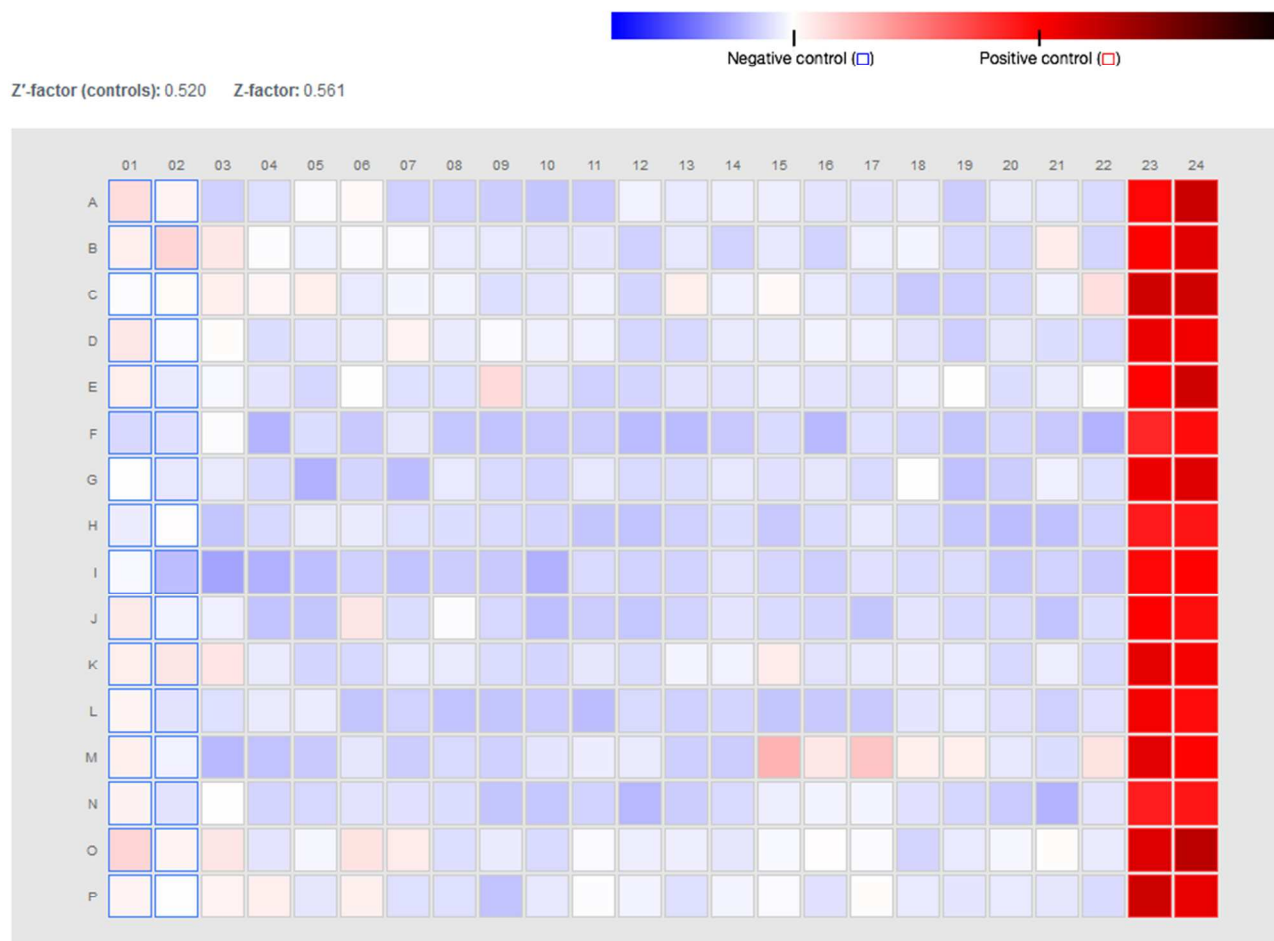



**Table S1.** DFT calculated  $^{13}\text{C}$  NMR chemical shifts for thalassosamide stereoisomer models.

| Position | Exp. (ppm) | Model 1      |             | Model 2      |             |
|----------|------------|--------------|-------------|--------------|-------------|
|          |            | Calcd. (ppm) | Delta (ppm) | Calcd. (ppm) | Delta (ppm) |
| 1        | 171.7      | 166.595      | 5.105       | 168.417      | 3.283       |
| 2        | 51.8       | 54.447       | 2.647       | 61.153       | 9.353       |
| 3        | 30.8       | 33.669       | 2.869       | 30.956       | 0.156       |
| 4        | 22.3       | 24.364       | 2.064       | 26.156       | 3.856       |
| 5        | 26.0       | 29.095       | 3.095       | 28.557       | 2.557       |
| 6        | 46.9       | 52.225       | 5.325       | 45.924       | 0.976       |
| 7        | 169.3      | 168.673      | 0.627       | 165.287      | 4.013       |
| 8        | 38.0       | 42.980       | 4.980       | 38.227       | 0.227       |
| 9        | 68.0       | 70.508       | 2.508       | 70.828       | 2.828       |
| 10       | 171.4      | 163.679      | 7.721       | 163.597      | 7.803       |
| 11       | 29.9       | 32.397       | 2.497       | 31.747       | 1.847       |
| 12       | 29.3       | 32.149       | 2.849       | 28.365       | 0.935       |
| 13       | 174.0      | 171.147      | 2.853       | 164.911      | 9.089       |
| 14       | 20.0       | 21.072       | 1.072       | 18.463       | 1.537       |
| 1'       | 171.7      | 166.595      | 5.105       | 168.417      | 3.283       |
| 2'       | 51.8       | 54.447       | 2.647       | 61.153       | 9.353       |
| 3'       | 30.8       | 33.669       | 2.869       | 30.956       | 0.156       |
| 4'       | 22.3       | 24.364       | 2.064       | 26.156       | 3.856       |
| 5'       | 26.0       | 29.095       | 3.095       | 28.557       | 2.557       |
| 6'       | 46.9       | 52.225       | 5.325       | 45.924       | 0.976       |
| 7'       | 169.3      | 168.673      | 0.627       | 165.287      | 4.013       |
| 8'       | 38.0       | 42.980       | 4.980       | 38.227       | 0.227       |
| 9'       | 68.0       | 70.508       | 2.508       | 70.828       | 2.828       |
| 10'      | 171.4      | 163.679      | 7.721       | 163.597      | 7.803       |
| 11'      | 29.9       | 32.397       | 2.497       | 31.747       | 1.847       |
| 12'      | 29.3       | 32.149       | 2.849       | 28.365       | 0.935       |
| 13'      | 174.0      | 171.147      | 2.853       | 164.911      | 9.089       |

**Supporting Information:** *Thalassosamide, a Siderophore Discovered from the Marine-Derived Bacterium Thalassospira profundimaris*

|        |       |         |         |         |        |
|--------|-------|---------|---------|---------|--------|
| 14'    | 20.0  | 21.072  | 1.072   | 18.463  | 1.537  |
| 1"     | 171.7 | 166.595 | 5.105   | 168.417 | 3.283  |
| 2"     | 51.8  | 54.447  | 2.647   | 61.153  | 9.353  |
| 3"     | 30.8  | 33.669  | 2.869   | 30.956  | 0.156  |
| 4"     | 22.3  | 24.364  | 2.064   | 26.156  | 3.856  |
| 5"     | 26.0  | 29.095  | 3.095   | 28.557  | 2.557  |
| 6"     | 46.9  | 52.225  | 5.325   | 45.924  | 0.976  |
| 7"     | 169.3 | 168.673 | 0.627   | 165.287 | 4.013  |
| 8"     | 38.0  | 42.980  | 4.980   | 38.227  | 0.227  |
| 9"     | 68.0  | 70.508  | 2.508   | 70.828  | 2.828  |
| 10"    | 171.4 | 163.679 | 7.721   | 163.597 | 7.803  |
| 11"    | 29.9  | 32.397  | 2.497   | 31.747  | 1.847  |
| 12"    | 29.3  | 32.149  | 2.849   | 28.365  | 0.935  |
| 13"    | 174.0 | 171.147 | 2.853   | 164.911 | 9.089  |
| 14"    | 20.0  | 21.072  | 1.072   | 18.463  | 1.537  |
| Total: |       |         | 138.636 |         | 145.38 |

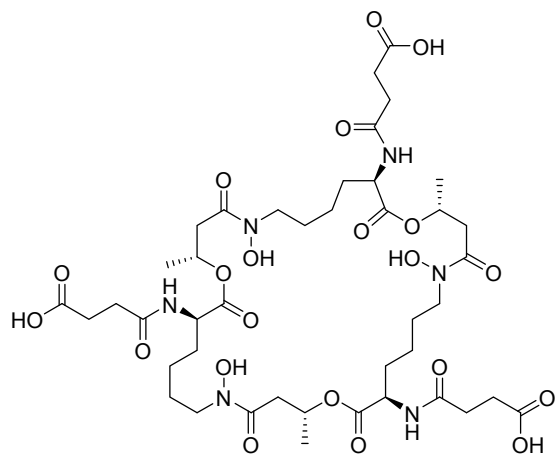

Model 1

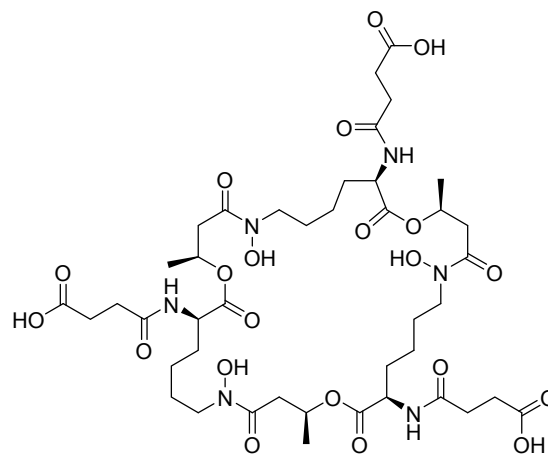

Model 2

**Table S2.** DP4 probability calculation for thalassosamide stereoisomer models

| Model | Configuration                                                                     | DP4 Probability |
|-------|-----------------------------------------------------------------------------------|-----------------|
| 1     | 2 <i>R</i> , 2' <i>R</i> , 2'' <i>R</i> , 9 <i>R</i> , 9' <i>R</i> , 9'' <i>R</i> | 100%            |
| 2     | 2 <i>R</i> , 2' <i>R</i> , 2'' <i>R</i> , 9 <i>S</i> , 9' <i>S</i> , 9'' <i>S</i> | 0%              |
